# Supplementary material for: A Functional Cartography of Cognitive Systems
Source: PubMed Central journal article supplement (PMC4668064; doi:10.1371/journal.pcbi.1004533), 2015-12-02

**A**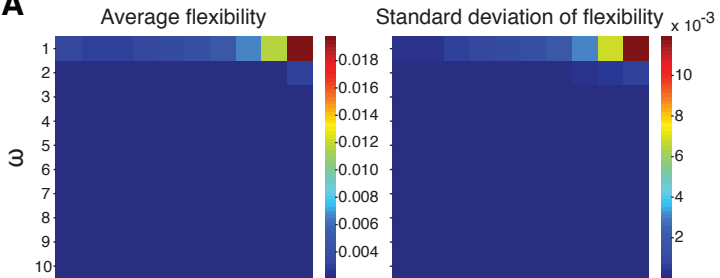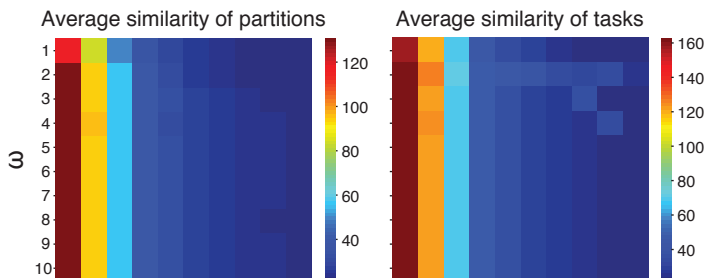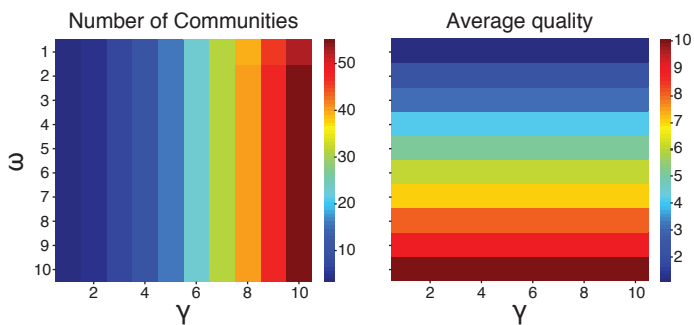**B**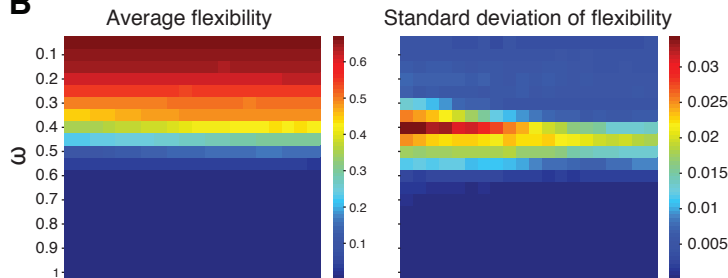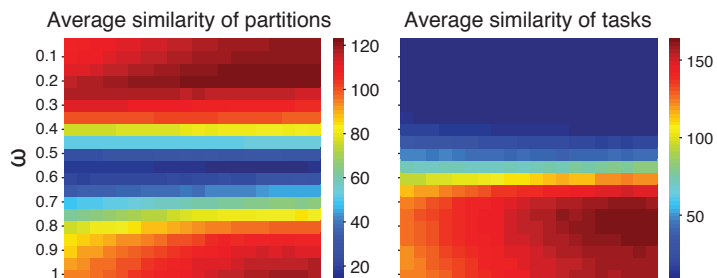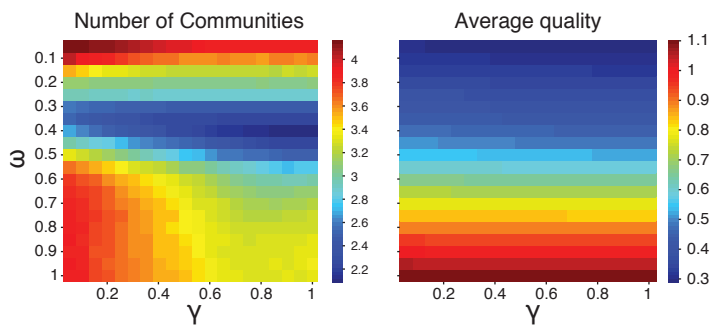

Supplement: pcbi.1004533.s006.pdf [file pcbi.1004533.s006.pdf]
