# Supplementary material for: A Functional Cartography of Cognitive Systems
Source: PubMed Central journal article supplement (PMC4668064; doi:10.1371/journal.pcbi.1004533), 2015-12-02

64 layers

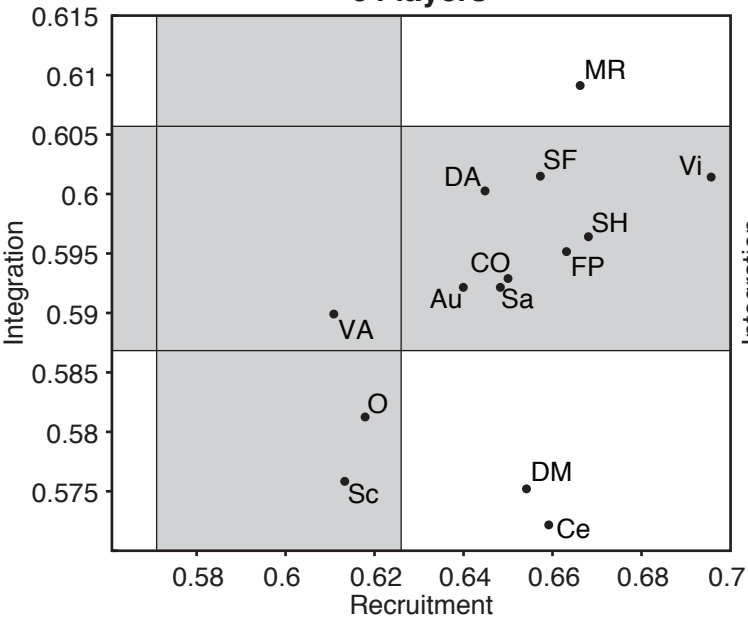

16 layers

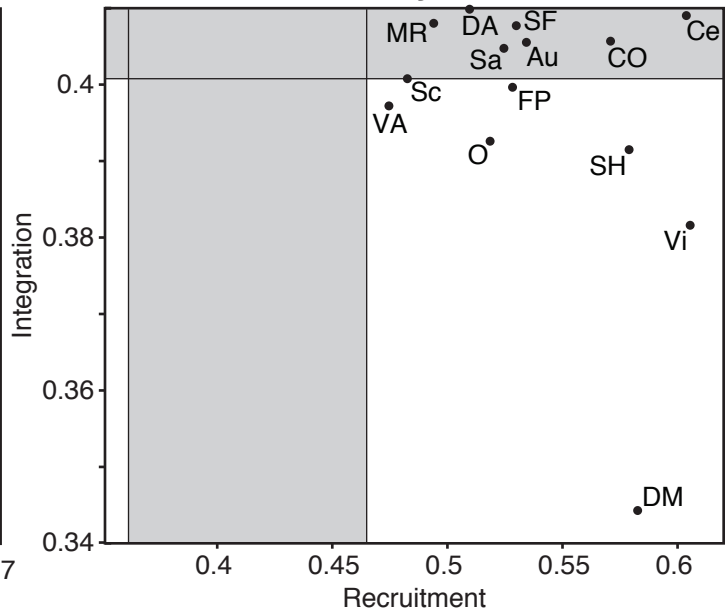

Supplement: pcbi.1004533.s010.pdf [file pcbi.1004533.s010.pdf]
