# Supplementary material for: A Functional Cartography of Cognitive Systems
Source: PubMed Central journal article supplement (PMC4668064; doi:10.1371/journal.pcbi.1004533), 2015-12-02

**Subject-specific HRF**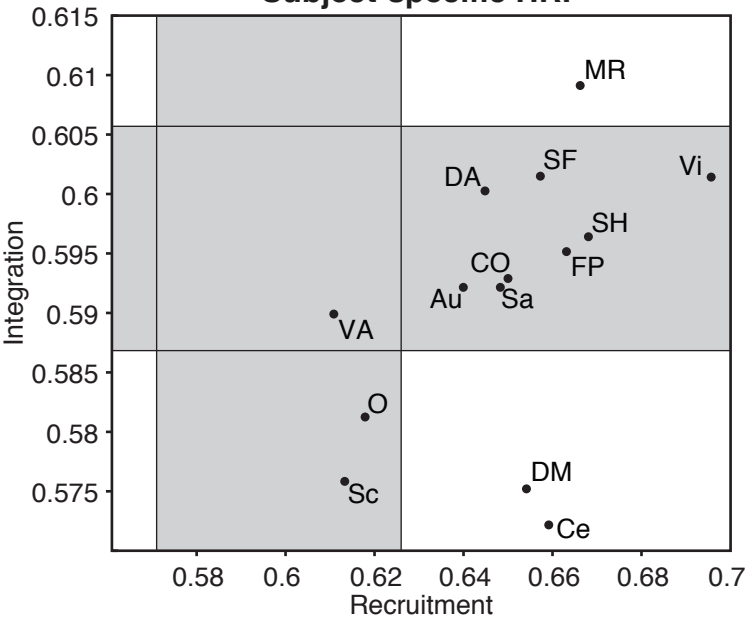**FIR model**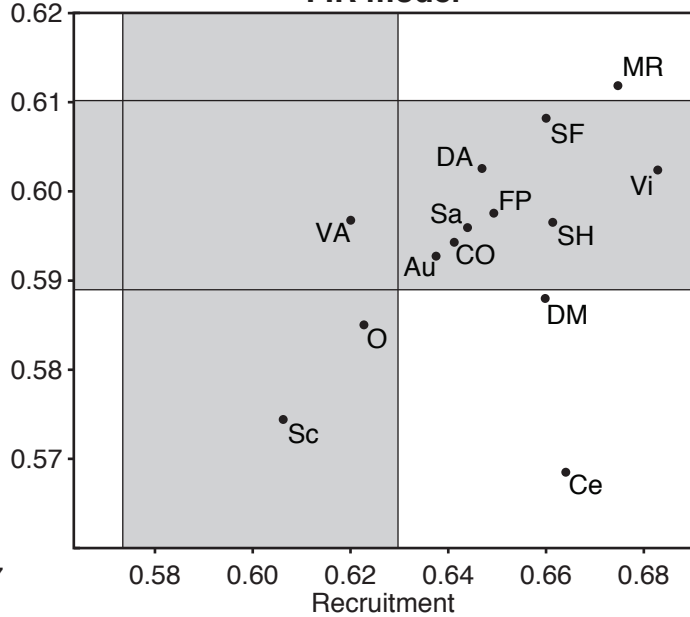

Supplement: pcbi.1004533.s013.pdf [file pcbi.1004533.s013.pdf]
